# Supplementary material for: Hispidin inhibits LPS-induced nitric oxide production in BV-2 microglial cells via ROS-dependent MAPK signaling
Source: PubMed Central journal article supplement — Exp Ther Med. 2021 Jul 7;22(3):970. doi: 10.3892/etm.2021.10402 (PMC8290425; doi:10.3892/etm.2021.10402), 2021-07-07

Figure S1. Effect of HP on iNOS mRNA content in LPS-treated BV-2 microglial cells. Cells were pre-treated with different concentrations of HP for 30 min prior to LPS treatment ( $1 \mu\text{g/ml}$ ) and were incubated for 24 h. (A) The content of iNOS mRNA was evaluated by quantitative PCR. (B) The associated mRNA levels are presented as means  $\pm$  SD. HP, hispidin; NO, nitric oxide; iNOS, inducible NO synthase; LPS, lipopolysaccharide.

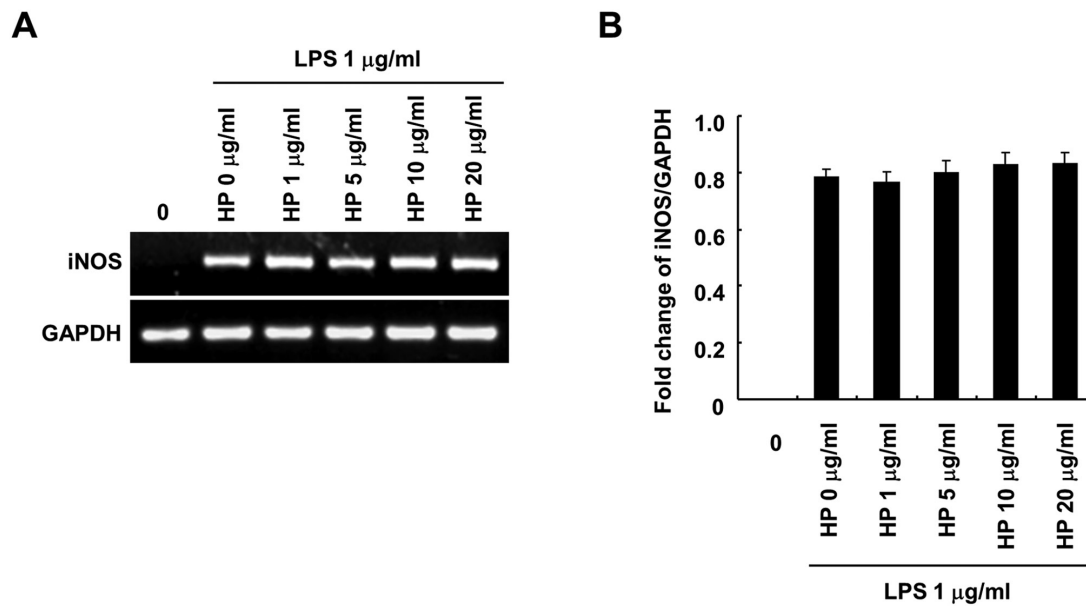

Supplement: Supplementary_Data.pdf [file Supplementary_Data.pdf]
